# Supplementary material
Source: PubMed Central journal article supplement (PMC6719660)

# Supplemental Figure S1

## Pan-Cytokeratin

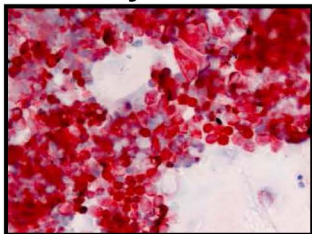

## CD34

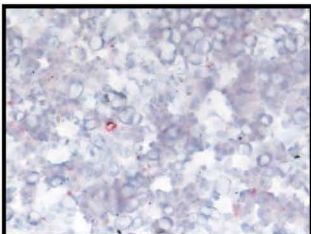

## CD326

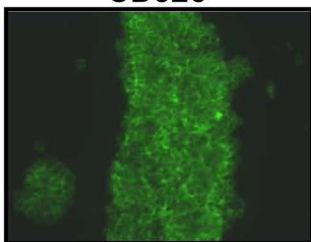

### Before Enrichment

### After Enrichment

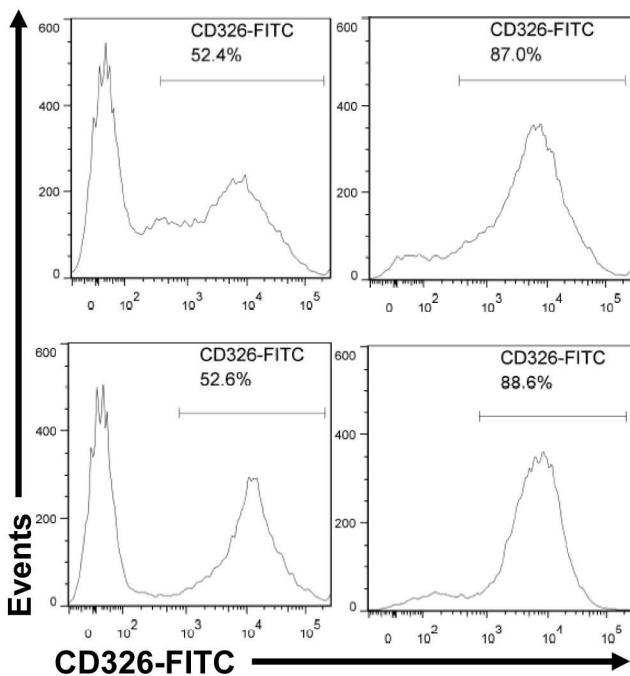

Supplement: mmc1.pdf [file mmc1.pdf]

**A**

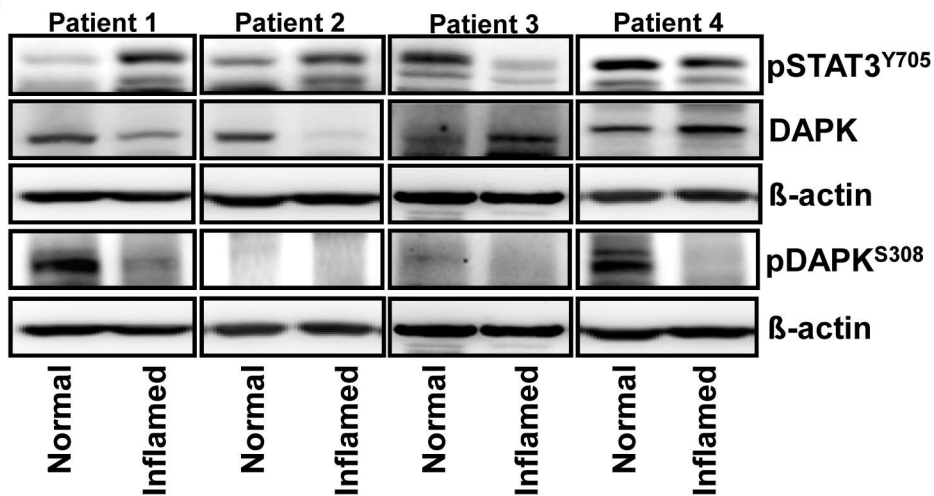

**B**

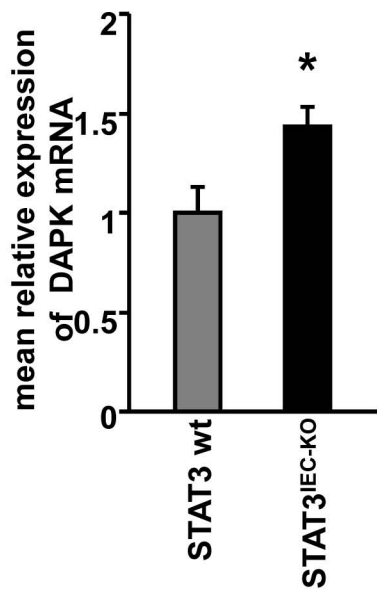

**C**

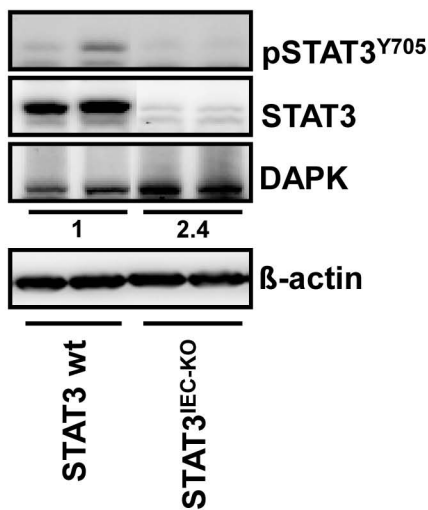

Supplement: mmc2.pdf [file mmc2.pdf]

**A** Pan-Cytokeratin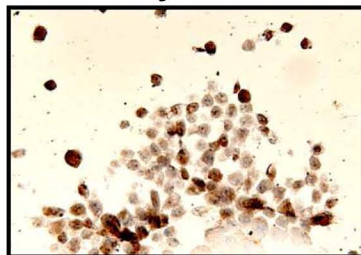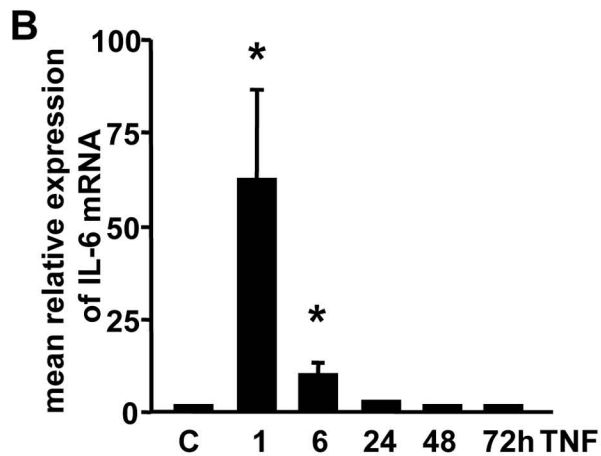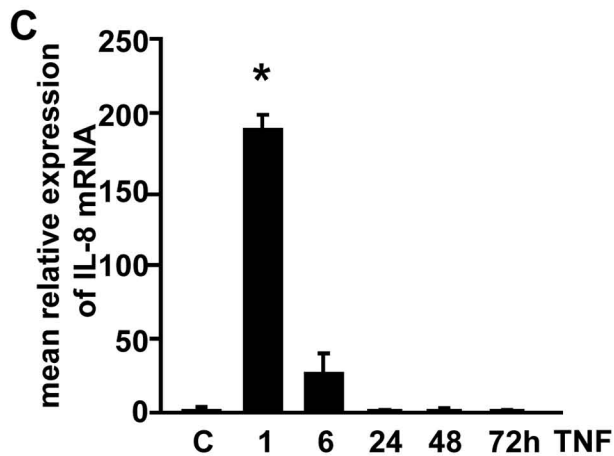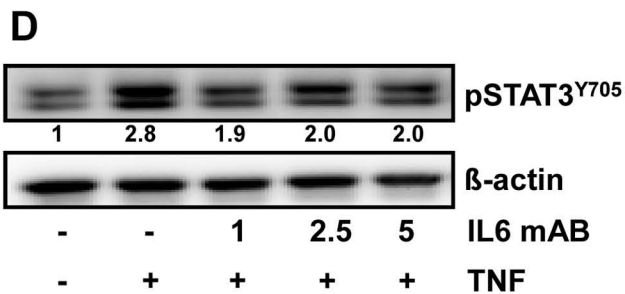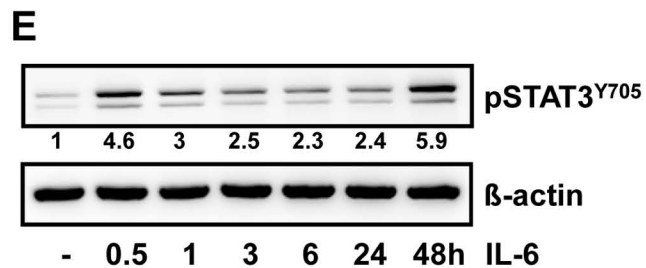

Supplement: mmc3.pdf [file mmc3.pdf]

Supplemental Figure 4

**A**

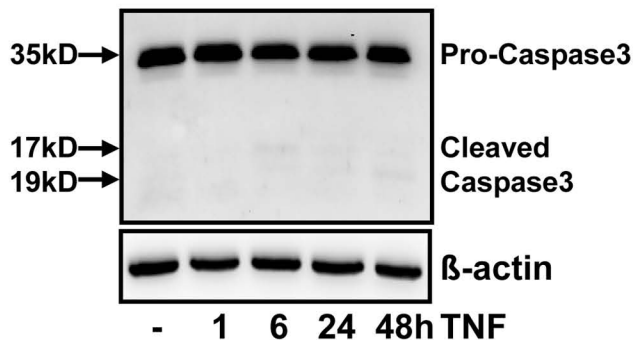

**B**

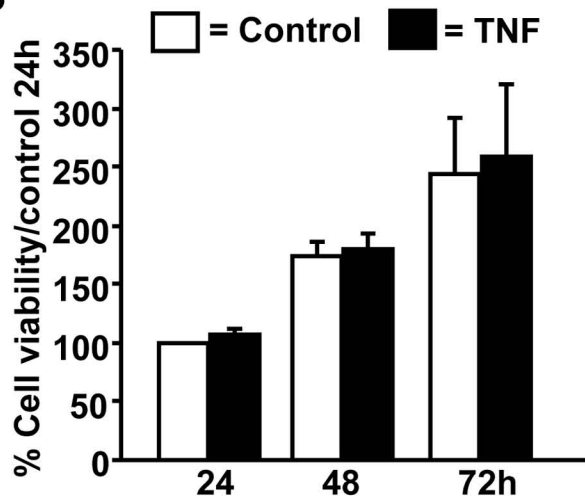

**C**

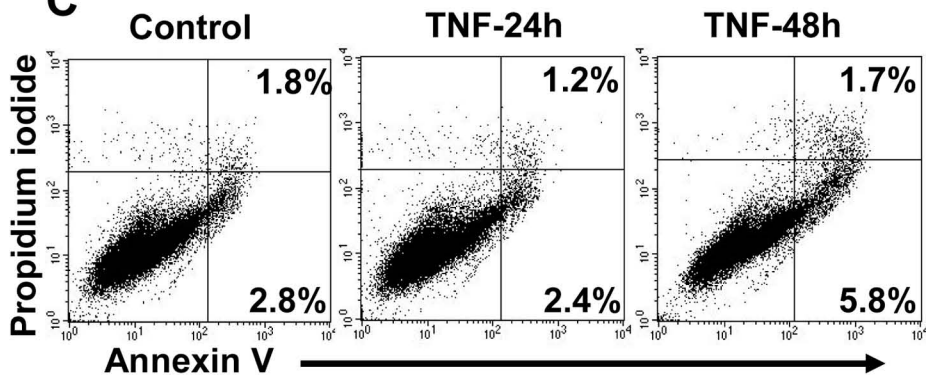

**D**

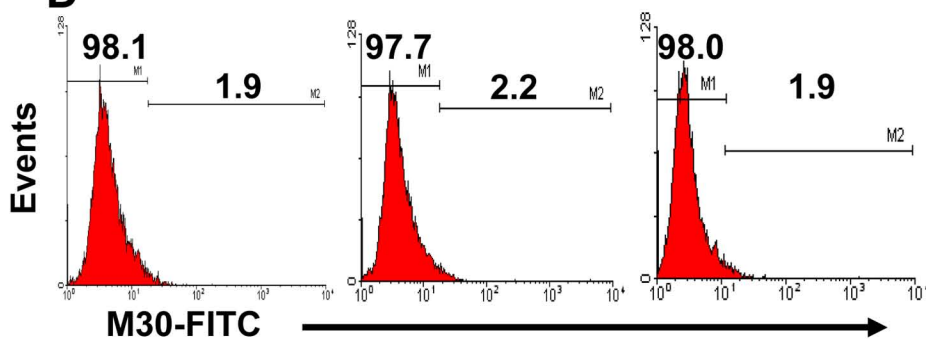

Supplement: mmc4.pdf [file mmc4.pdf]

Supplemental Figure S5

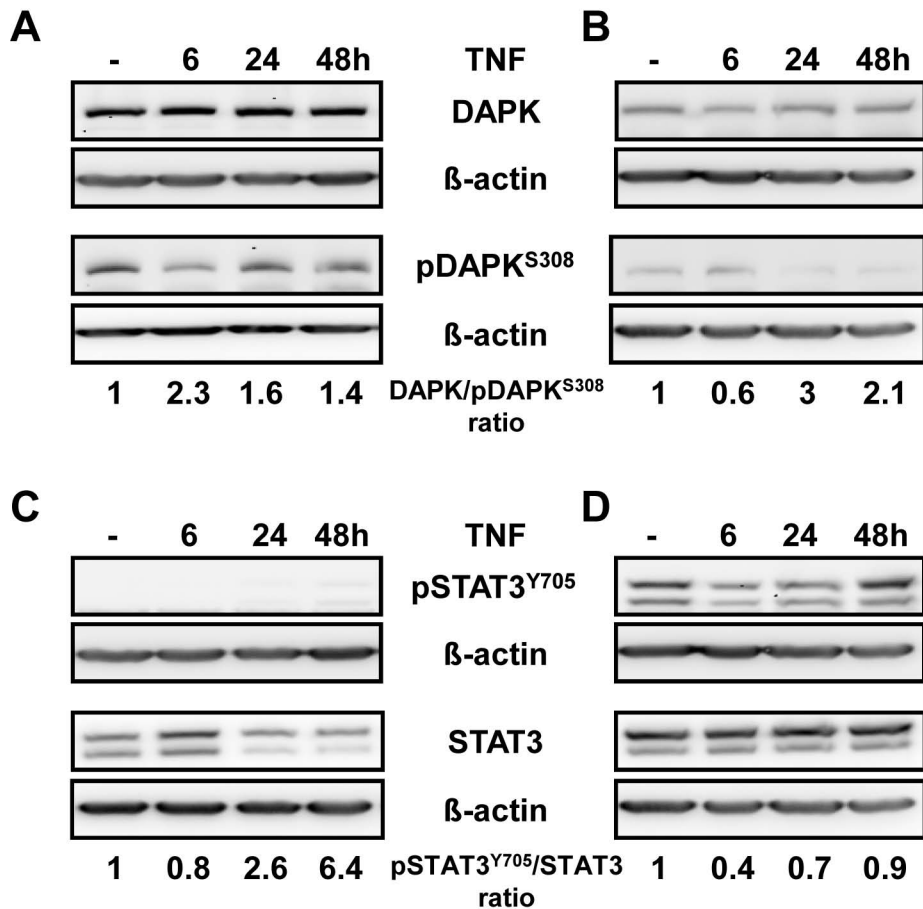

Supplement: mmc5.pdf [file mmc5.pdf]

Supplemental Figure S6

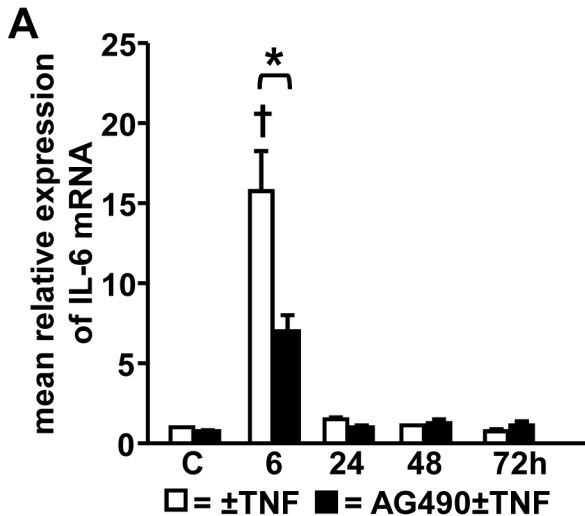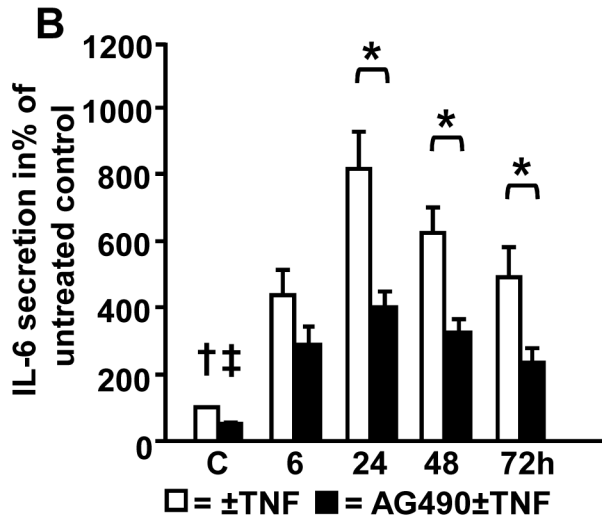

Supplement: mmc6.pdf [file mmc6.pdf]
